# Supplementary material for: Valorization of Avocado Seed Wastes for Antioxidant Phenolics and Carbohydrates Recovery Using Deep Eutectic Solvents (DES)
Source: MDPI journal article supplement (doi:10.3390/antiox12061156), 2023-05-26

# Valorization of avocado seed wastes for antioxidant phenolics and carbohydrates recovery using deep eutectic solvents (DES)

Alexandra Del-Castillo-Llamosas<sup>1</sup>, Fernando Rodríguez-Rebelo<sup>1</sup>, Beatriz Rodríguez-Martínez<sup>1</sup>, Adrián Mallo-Fraga<sup>1</sup>, Pablo G. Del-Río<sup>1,2,\*</sup>, Beatriz Gullón<sup>1</sup>

<sup>1</sup> Universidade de Vigo, Departamento de Enxeñaría Química, Facultade de Ciencias, 32004 Ourense, Spain; alexandra.castillo@uvigo.es (A.C.D.L.), frodriguez@uvigo.es (F.R.R.), beatriz.rodriguez@uvigo.es (B.R.M.), pdelrio@uvigo.es (P.G.D.R.), bgullon@uvigo.es (B.G.).

<sup>2</sup> Stokes Laboratories, School of Engineering, Bernal Institute, University of Limerick, Limerick, V94 T9PX, Ireland; pablo.garciadelrio@ul.ie (P.G.D.R.).

\* Correspondence: pdelrio@uvigo.es (P.G.D.R.)

Fig S1. Chromatograms of the phytochemicals identified by HPLC-ESI.

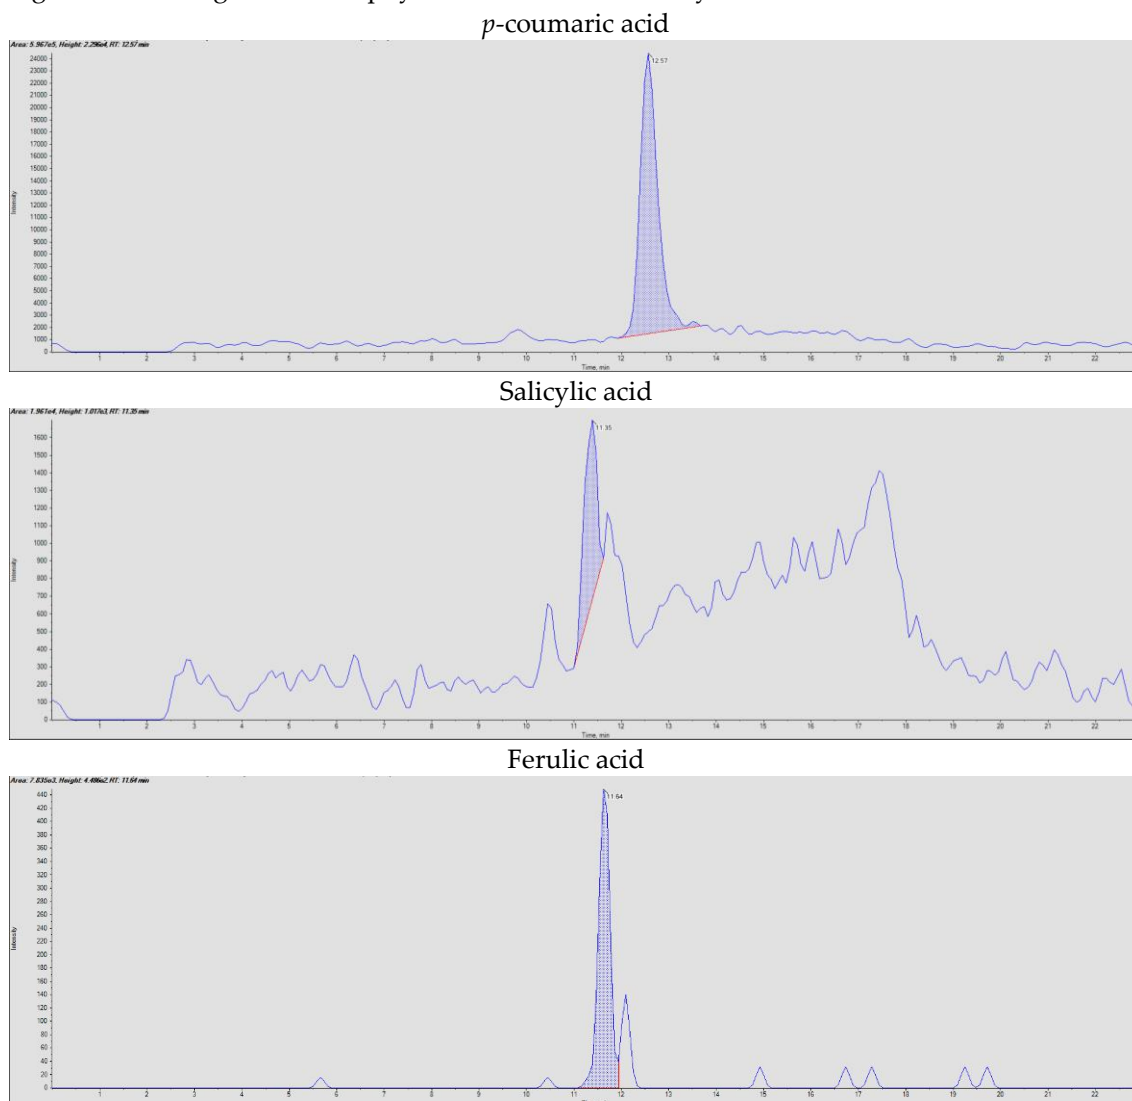

Phthalic acid

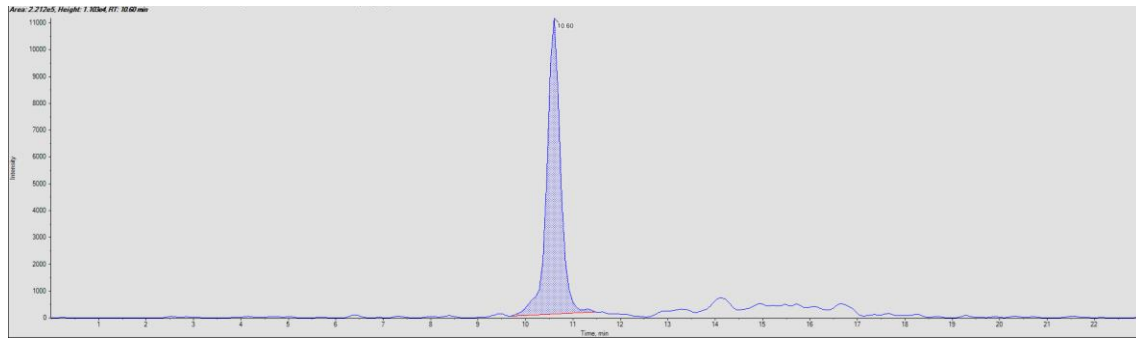

Protocatechuic acid

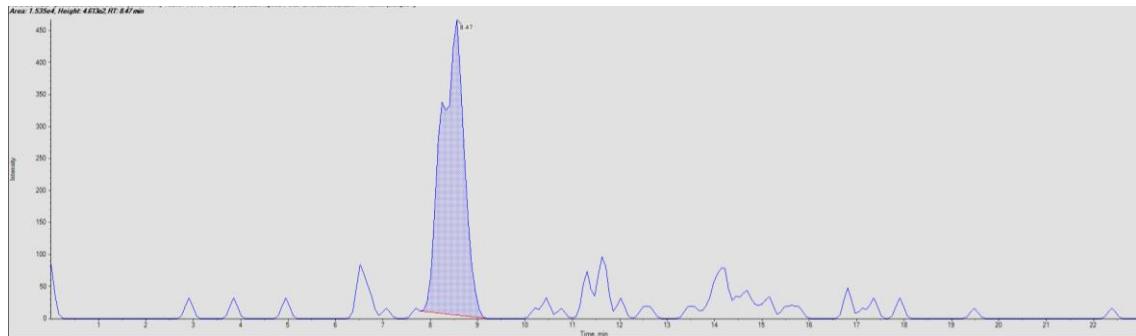

Vanillic acid

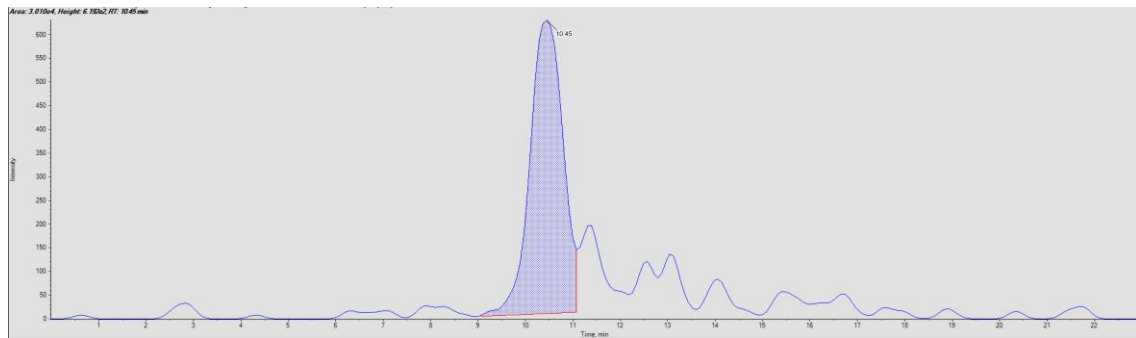

Naringenin

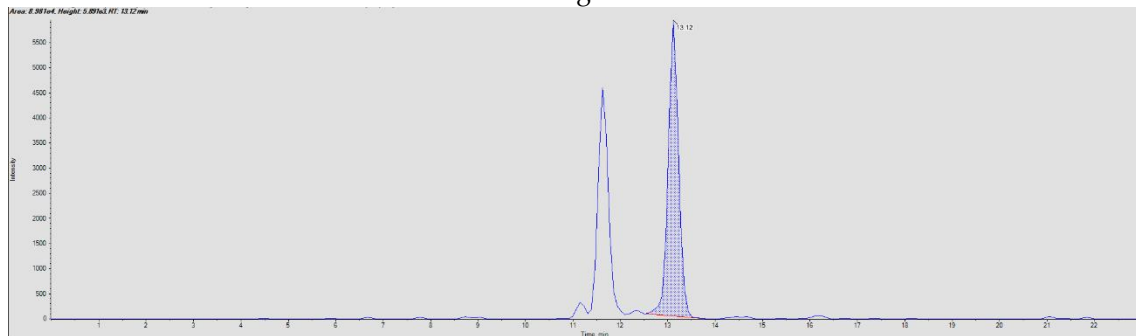

Apigenin

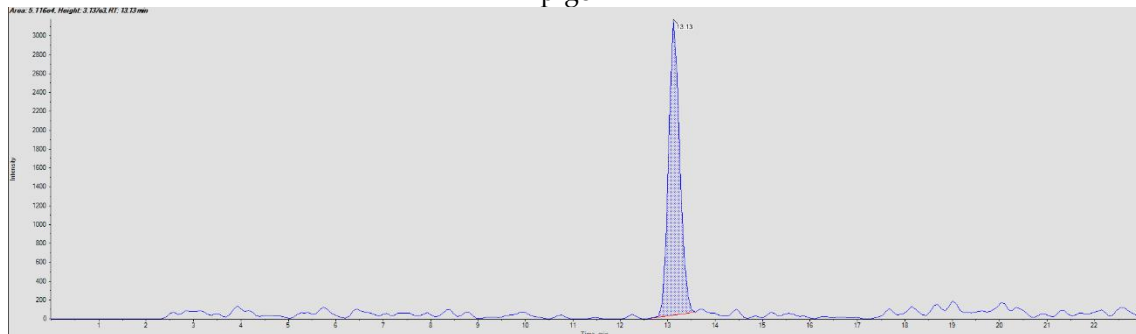

Supplement: s1 [file s1]
